# Supplementary material
Source: ML conference proceedings conference paper supplement (https://proceedings.mlr.press/v139/wang21s.html)
Supplement: Supplementary file 2 [file wang21s-supp.zip]

Archive with 470 entries (459 files):
- supp/
- __MACOSX/._supp
- supp/supp.pdf
- __MACOSX/supp/._supp.pdf
- supp/.DS_Store
- __MACOSX/supp/._.DS_Store
- supp/animations/
- __MACOSX/supp/._animations
- supp/decodings/
- __MACOSX/supp/._decodings
- supp/animations/Note.txt
- __MACOSX/supp/animations/._Note.txt
- supp/animations/omniglot characters/
- __MACOSX/supp/animations/._omniglot characters
- supp/animations/miniImageNet examples/
- __MACOSX/supp/animations/._miniImageNet examples
- supp/decodings/natural_image_pairs/
- __MACOSX/supp/decodings/._natural_image_pairs
- supp/decodings/sketches_pairs/
- __MACOSX/supp/decodings/._sketches_pairs
- supp/animations/omniglot characters/Armenian35-678.mp4
- __MACOSX/supp/animations/omniglot characters/._Armenian35-678.mp4
- supp/animations/omniglot characters/Alphabet_of_the_Magi02-101.mp4
- __MACOSX/supp/animations/omniglot characters/._Alphabet_of_the_Magi02-101.mp4
- supp/animations/omniglot characters/Angelic03-251.mp4
- __MACOSX/supp/animations/omniglot characters/._Angelic03-251.mp4
- supp/animations/omniglot characters/Arcadian09-531.mp4
- __MACOSX/supp/animations/omniglot characters/._Arcadian09-531.mp4
- supp/animations/omniglot characters/Anglo_saxon18-384.mp4
- __MACOSX/supp/animations/omniglot characters/._Anglo_saxon18-384.mp4
- supp/animations/omniglot characters/Angelic13-215.mp4
- __MACOSX/supp/animations/omniglot characters/._Angelic13-215.mp4
- supp/animations/omniglot characters/Arcadian12-489.mp4
- __MACOSX/supp/animations/omniglot characters/._Arcadian12-489.mp4
- supp/animations/omniglot characters/Alphabet_of_the_magi15-115.mp4
- __MACOSX/supp/animations/omniglot characters/._Alphabet_of_the_magi15-115.mp4
- supp/animations/omniglot characters/Alphabet_of_the_Magi03-178.mp4
- __MACOSX/supp/animations/omniglot characters/._Alphabet_of_the_Magi03-178.mp4
- supp/animations/omniglot characters/Anglo_saxon15-325.mp4
- __MACOSX/supp/animations/omniglot characters/._Anglo_saxon15-325.mp4
- supp/animations/miniImageNet examples/n02091831-371.mp4
- __MACOSX/supp/animations/miniImageNet examples/._n02091831-371.mp4
- supp/animations/miniImageNet examples/n04522168-473.mp4
- __MACOSX/supp/animations/miniImageNet examples/._n04522168-473.mp4
- supp/animations/miniImageNet examples/n02443484-169.mp4
- __MACOSX/supp/animations/miniImageNet examples/._n02443484-169.mp4
- supp/animations/miniImageNet examples/n04522168-3.mp4
- __MACOSX/supp/animations/miniImageNet examples/._n04522168-3.mp4
- supp/animations/miniImageNet examples/n01558993-216.mp4
- __MACOSX/supp/animations/miniImageNet examples/._n01558993-216.mp4
- supp/animations/miniImageNet examples/n02089867-293.mp4
- __MACOSX/supp/animations/miniImageNet examples/._n02089867-293.mp4
- supp/animations/miniImageNet examples/n02091831-327.mp4
- __MACOSX/supp/animations/miniImageNet examples/._n02091831-327.mp4
- supp/animations/miniImageNet examples/n0153289-342.mp4
- __MACOSX/supp/animations/miniImageNet examples/._n0153289-342.mp4
- supp/animations/miniImageNet examples/n02443484-113.mp4
- __MACOSX/supp/animations/miniImageNet examples/._n02443484-113.mp4
- supp/decodings/natural_image_pairs/unseen classes/
- __MACOSX/supp/decodings/natural_image_pairs/._unseen classes
- supp/decodings/natural_image_pairs/seenclasses/
- __MACOSX/supp/decodings/natural_image_pairs/._seenclasses
- supp/decodings/sketches_pairs/seen_classes/
- __MACOSX/supp/decodings/sketches_pairs/._seen_classes
- supp/decodings/natural_image_pairs/unseen classes/n02871525-33_predicted.jpg
- __MACOSX/supp/decodings/natural_image_pairs/unseen classes/._n02871525-33_predicted.jpg
- supp/decodings/natural_image_pairs/unseen classes/n02129165-1061_predicted.jpg
- __MACOSX/supp/decodings/natural_image_pairs/unseen classes/._n02129165-1061_predicted.jpg
- supp/decodings/natural_image_pairs/unseen classes/n03146219-1206_predicted.jpg
- __MACOSX/supp/decodings/natural_image_pairs/unseen classes/._n03146219-1206_predicted.jpg
- supp/decodings/natural_image_pairs/unseen classes/n03775546-37_predicted.jpg
- __MACOSX/supp/decodings/natural_image_pairs/unseen classes/._n03775546-37_predicted.jpg
- supp/decodings/natural_image_pairs/unseen classes/n02871525-99_predicted.jpg
- __MACOSX/supp/decodings/natural_image_pairs/unseen classes/._n02871525-99_predicted.jpg
- supp/decodings/natural_image_pairs/unseen classes/n02129165-902.jpg
- __MACOSX/supp/decodings/natural_image_pairs/unseen classes/._n02129165-902.jpg
- supp/decodings/natural_image_pairs/unseen classes/n03146219-1206_x.jpg
- __MACOSX/supp/decodings/natural_image_pairs/unseen classes/._n03146219-1206_x.jpg
- supp/decodings/natural_image_pairs/unseen classes/n02129165-902_x.jpg
- __MACOSX/supp/decodings/natural_image_pairs/unseen classes/._n02129165-902_x.jpg
- supp/decodings/natural_image_pairs/unseen classes/n02099601-2007_x.jpg
- __MACOSX/supp/decodings/natural_image_pairs/unseen classes/._n02099601-2007_x.jpg
- supp/decodings/natural_image_pairs/unseen classes/n04522168-96_predicted.jpg
- __MACOSX/supp/decodings/natural_image_pairs/unseen classes/._n04522168-96_predicted.jpg
- supp/decodings/natural_image_pairs/unseen classes/n02099601-2007.jpg
- __MACOSX/supp/decodings/natural_image_pairs/unseen classes/._n02099601-2007.jpg
- supp/decodings/natural_image_pairs/unseen classes/n04418357-916_predicted.jpg
- __MACOSX/supp/decodings/natural_image_pairs/unseen classes/._n04418357-916_predicted.jpg
- supp/decodings/natural_image_pairs/unseen classes/n01981276-899_x.jpg
- __MACOSX/supp/decodings/natural_image_pairs/unseen classes/._n01981276-899_x.jpg
- supp/decodings/natural_image_pairs/unseen classes/n07613480-11681_x.jpg
- __MACOSX/supp/decodings/natural_image_pairs/unseen classes/._n07613480-11681_x.jpg
- supp/decodings/natural_image_pairs/unseen classes/n02129165-902_predicted.jpg
- __MACOSX/supp/decodings/natural_image_pairs/unseen classes/._n02129165-902_predicted.jpg
- supp/decodings/natural_image_pairs/unseen classes/n03775546-1039.jpg
- __MACOSX/supp/decodings/natural_image_pairs/unseen classes/._n03775546-1039.jpg
- supp/decodings/natural_image_pairs/unseen classes/n02099601-864.jpg
- __MACOSX/supp/decodings/natural_image_pairs/unseen classes/._n02099601-864.jpg
- supp/decodings/natural_image_pairs/unseen classes/n02099601-864_predicted.jpg
- __MACOSX/supp/decodings/natural_image_pairs/unseen classes/._n02099601-864_predicted.jpg
- supp/decodings/natural_image_pairs/unseen classes/n04149813-11_predicted.jpg
- __MACOSX/supp/decodings/natural_image_pairs/unseen classes/._n04149813-11_predicted.jpg
- supp/decodings/natural_image_pairs/unseen classes/n03775546-1039_predicted.jpg
- __MACOSX/supp/decodings/natural_image_pairs/unseen classes/._n03775546-1039_predicted.jpg
- supp/decodings/natural_image_pairs/unseen classes/n03146219-1206.jpg
- __MACOSX/supp/decodings/natural_image_pairs/unseen classes/._n03146219-1206.jpg
- supp/decodings/natural_image_pairs/unseen classes/n04418357-916_x.jpg
- __MACOSX/supp/decodings/natural_image_pairs/unseen classes/._n04418357-916_x.jpg
- supp/decodings/natural_image_pairs/unseen classes/n07613480-10172_predicted.jpg
- __MACOSX/supp/decodings/natural_image_pairs/unseen classes/._n07613480-10172_predicted.jpg
- supp/decodings/natural_image_pairs/unseen classes/n02219486-1608_predicted.jpg
- __MACOSX/supp/decodings/natural_image_pairs/unseen classes/._n02219486-1608_predicted.jpg
- supp/decodings/natural_image_pairs/unseen classes/n02099601-1790_predicted.jpg
- __MACOSX/supp/decodings/natural_image_pairs/unseen classes/._n02099601-1790_predicted.jpg
- supp/decodings/natural_image_pairs/unseen classes/n02219486-756_x.jpg
- __MACOSX/supp/decodings/natural_image_pairs/unseen classes/._n02219486-756_x.jpg
- supp/decodings/natural_image_pairs/unseen classes/n03775546-1039_x.jpg
- __MACOSX/supp/decodings/natural_image_pairs/unseen classes/._n03775546-1039_x.jpg
- supp/decodings/natural_image_pairs/unseen classes/n02099601-2046_x.jpg
- __MACOSX/supp/decodings/natural_image_pairs/unseen classes/._n02099601-2046_x.jpg
- supp/decodings/natural_image_pairs/unseen classes/n02219486-243_x.jpg
- __MACOSX/supp/decodings/natural_image_pairs/unseen classes/._n02219486-243_x.jpg
- supp/decodings/natural_image_pairs/unseen classes/n02871525-2954.jpg
- __MACOSX/supp/decodings/natural_image_pairs/unseen classes/._n02871525-2954.jpg
- supp/decodings/natural_image_pairs/unseen classes/n03146219-1477_x.jpg
- __MACOSX/supp/decodings/natural_image_pairs/unseen classes/._n03146219-1477_x.jpg
- supp/decodings/natural_image_pairs/unseen classes/n02129165-1061_x.jpg
- __MACOSX/supp/decodings/natural_image_pairs/unseen classes/._n02129165-1061_x.jpg
- supp/decodings/natural_image_pairs/unseen classes/n01981276-899.jpg
- __MACOSX/supp/decodings/natural_image_pairs/unseen classes/._n01981276-899.jpg
- supp/decodings/natural_image_pairs/unseen classes/n03775546-579_predicted.jpg
- __MACOSX/supp/decodings/natural_image_pairs/unseen classes/._n03775546-579_predicted.jpg
- supp/decodings/natural_image_pairs/unseen classes/n03775546-579.jpg
- __MACOSX/supp/decodings/natural_image_pairs/unseen classes/._n03775546-579.jpg
- supp/decodings/natural_image_pairs/unseen classes/n02219486-1608_x.jpg
- __MACOSX/supp/decodings/natural_image_pairs/unseen classes/._n02219486-1608_x.jpg
- supp/decodings/natural_image_pairs/unseen classes/n02099601-1790.jpg
- __MACOSX/supp/decodings/natural_image_pairs/unseen classes/._n02099601-1790.jpg
- supp/decodings/natural_image_pairs/unseen classes/n02871525-1222.jpg
- __MACOSX/supp/decodings/natural_image_pairs/unseen classes/._n02871525-1222.jpg
- supp/decodings/natural_image_pairs/unseen classes/n04418357-677.jpg
- __MACOSX/supp/decodings/natural_image_pairs/unseen classes/._n04418357-677.jpg
- supp/decodings/natural_image_pairs/unseen classes/n03775546-579_x.jpg
- __MACOSX/supp/decodings/natural_image_pairs/unseen classes/._n03775546-579_x.jpg
- supp/decodings/natural_image_pairs/unseen classes/n02443484-1652_predicted.jpg
- __MACOSX/supp/decodings/natural_image_pairs/unseen classes/._n02443484-1652_predicted.jpg
- supp/decodings/natural_image_pairs/unseen classes/n02099601-2046_predicted.jpg
- __MACOSX/supp/decodings/natural_image_pairs/unseen classes/._n02099601-2046_predicted.jpg
- supp/decodings/natural_image_pairs/unseen classes/n02443484-2952.jpg
- __MACOSX/supp/decodings/natural_image_pairs/unseen classes/._n02443484-2952.jpg
- supp/decodings/natural_image_pairs/unseen classes/n03127925-221.jpg
- __MACOSX/supp/decodings/natural_image_pairs/unseen classes/._n03127925-221.jpg
- supp/decodings/natural_image_pairs/unseen classes/n03127925-1337.jpg
- __MACOSX/supp/decodings/natural_image_pairs/unseen classes/._n03127925-1337.jpg
- supp/decodings/natural_image_pairs/unseen classes/n02099601-864_x.jpg
- __MACOSX/supp/decodings/natural_image_pairs/unseen classes/._n02099601-864_x.jpg
- supp/decodings/natural_image_pairs/unseen classes/n07613480-10172_x.jpg
- __MACOSX/supp/decodings/natural_image_pairs/unseen classes/._n07613480-10172_x.jpg
- supp/decodings/natural_image_pairs/unseen classes/n03146219-1477.jpg
- __MACOSX/supp/decodings/natural_image_pairs/unseen classes/._n03146219-1477.jpg
- supp/decodings/natural_image_pairs/unseen classes/n04149813-11_x.jpg
- __MACOSX/supp/decodings/natural_image_pairs/unseen classes/._n04149813-11_x.jpg
- supp/decodings/natural_image_pairs/unseen classes/n02871525-1222_predicted.jpg
- __MACOSX/supp/decodings/natural_image_pairs/unseen classes/._n02871525-1222_predicted.jpg
- supp/decodings/natural_image_pairs/unseen classes/n03775546-37_x.jpg
- __MACOSX/supp/decodings/natural_image_pairs/unseen classes/._n03775546-37_x.jpg
- supp/decodings/natural_image_pairs/unseen classes/n02443484-1652_x.jpg
- __MACOSX/supp/decodings/natural_image_pairs/unseen classes/._n02443484-1652_x.jpg
- supp/decodings/natural_image_pairs/unseen classes/n07613480-11681_predicted.jpg
- __MACOSX/supp/decodings/natural_image_pairs/unseen classes/._n07613480-11681_predicted.jpg
- supp/decodings/natural_image_pairs/unseen classes/n02871525-33.jpg
- __MACOSX/supp/decodings/natural_image_pairs/unseen classes/._n02871525-33.jpg
- supp/decodings/natural_image_pairs/unseen classes/n02443484-2952_x.jpg
- __MACOSX/supp/decodings/natural_image_pairs/unseen classes/._n02443484-2952_x.jpg
- supp/decodings/natural_image_pairs/unseen classes/n02443484-1652.jpg
- __MACOSX/supp/decodings/natural_image_pairs/unseen classes/._n02443484-1652.jpg
- supp/decodings/natural_image_pairs/unseen classes/n02871525-2704.jpg
- __MACOSX/supp/decodings/natural_image_pairs/unseen classes/._n02871525-2704.jpg
- supp/decodings/natural_image_pairs/unseen classes/n04522168-96_x.jpg
- __MACOSX/supp/decodings/natural_image_pairs/unseen classes/._n04522168-96_x.jpg
- supp/decodings/natural_image_pairs/unseen classes/n02871525-99_x.jpg
- __MACOSX/supp/decodings/natural_image_pairs/unseen classes/._n02871525-99_x.jpg
- supp/decodings/natural_image_pairs/unseen classes/n02099601-2046.jpg
- __MACOSX/supp/decodings/natural_image_pairs/unseen classes/._n02099601-2046.jpg
- supp/decodings/natural_image_pairs/unseen classes/n03272010-2130.jpg
- __MACOSX/supp/decodings/natural_image_pairs/unseen classes/._n03272010-2130.jpg
- supp/decodings/natural_image_pairs/unseen classes/n03127925-1337_predicted.jpg
- __MACOSX/supp/decodings/natural_image_pairs/unseen classes/._n03127925-1337_predicted.jpg
- supp/decodings/natural_image_pairs/unseen classes/n04522168-1341_predicted.jpg
- __MACOSX/supp/decodings/natural_image_pairs/unseen classes/._n04522168-1341_predicted.jpg
- supp/decodings/natural_image_pairs/unseen classes/n07613480-10172.jpg
- __MACOSX/supp/decodings/natural_image_pairs/unseen classes/._n07613480-10172.jpg
- supp/decodings/natural_image_pairs/unseen classes/n02099601-1770_x.jpg
- __MACOSX/supp/decodings/natural_image_pairs/unseen classes/._n02099601-1770_x.jpg
- supp/decodings/natural_image_pairs/unseen classes/n07613480-11681.jpg
- __MACOSX/supp/decodings/natural_image_pairs/unseen classes/._n07613480-11681.jpg
- supp/decodings/natural_image_pairs/unseen classes/n02871525-2954_x.jpg
- __MACOSX/supp/decodings/natural_image_pairs/unseen classes/._n02871525-2954_x.jpg
- supp/decodings/natural_image_pairs/unseen classes/n03775546-37.jpg
- __MACOSX/supp/decodings/natural_image_pairs/unseen classes/._n03775546-37.jpg
- supp/decodings/natural_image_pairs/unseen classes/n04418357-677_x.jpg
- __MACOSX/supp/decodings/natural_image_pairs/unseen classes/._n04418357-677_x.jpg
- supp/decodings/natural_image_pairs/unseen classes/n03127925-1317_x.jpg
- __MACOSX/supp/decodings/natural_image_pairs/unseen classes/._n03127925-1317_x.jpg
- supp/decodings/natural_image_pairs/unseen classes/n03146219-1477_predicted.jpg
- __MACOSX/supp/decodings/natural_image_pairs/unseen classes/._n03146219-1477_predicted.jpg
- supp/decodings/natural_image_pairs/unseen classes/n02443484-2952_predicted.jpg
- __MACOSX/supp/decodings/natural_image_pairs/unseen classes/._n02443484-2952_predicted.jpg
- supp/decodings/natural_image_pairs/unseen classes/n04418357-916.jpg
- __MACOSX/supp/decodings/natural_image_pairs/unseen classes/._n04418357-916.jpg
- supp/decodings/natural_image_pairs/unseen classes/n02871525-294_predicted.jpg
- __MACOSX/supp/decodings/natural_image_pairs/unseen classes/._n02871525-294_predicted.jpg
- supp/decodings/natural_image_pairs/unseen classes/n02219486-756.jpg
- __MACOSX/supp/decodings/natural_image_pairs/unseen classes/._n02219486-756.jpg
- supp/decodings/natural_image_pairs/unseen classes/n02871525-1222_x.jpg
- __MACOSX/supp/decodings/natural_image_pairs/unseen classes/._n02871525-1222_x.jpg
- supp/decodings/natural_image_pairs/unseen classes/n04146614-1189_x.jpg
- __MACOSX/supp/decodings/natural_image_pairs/unseen classes/._n04146614-1189_x.jpg
- supp/decodings/natural_image_pairs/unseen classes/n04418357-677_predicted.jpg
- __MACOSX/supp/decodings/natural_image_pairs/unseen classes/._n04418357-677_predicted.jpg
- supp/decodings/natural_image_pairs/unseen classes/n04522168-96.jpg
- __MACOSX/supp/decodings/natural_image_pairs/unseen classes/._n04522168-96.jpg
- supp/decodings/natural_image_pairs/unseen classes/n02871525-294.jpg
- __MACOSX/supp/decodings/natural_image_pairs/unseen classes/._n02871525-294.jpg
- supp/decodings/natural_image_pairs/unseen classes/n02099601-2007_predicted.jpg
- __MACOSX/supp/decodings/natural_image_pairs/unseen classes/._n02099601-2007_predicted.jpg
- supp/decodings/natural_image_pairs/unseen classes/n02219486-243_predicted.jpg
- __MACOSX/supp/decodings/natural_image_pairs/unseen classes/._n02219486-243_predicted.jpg
- supp/decodings/natural_image_pairs/unseen classes/n04146614-1189_predicted.jpg
- __MACOSX/supp/decodings/natural_image_pairs/unseen classes/._n04146614-1189_predicted.jpg
- supp/decodings/natural_image_pairs/unseen classes/n02219486-243.jpg
- __MACOSX/supp/decodings/natural_image_pairs/unseen classes/._n02219486-243.jpg
- supp/decodings/natural_image_pairs/unseen classes/n03127925-221_predicted.jpg
- __MACOSX/supp/decodings/natural_image_pairs/unseen classes/._n03127925-221_predicted.jpg
- supp/decodings/natural_image_pairs/unseen classes/n03272010-2130_x.jpg
- __MACOSX/supp/decodings/natural_image_pairs/unseen classes/._n03272010-2130_x.jpg
- supp/decodings/natural_image_pairs/unseen classes/n02871525-2704_x.jpg
- __MACOSX/supp/decodings/natural_image_pairs/unseen classes/._n02871525-2704_x.jpg
- supp/decodings/natural_image_pairs/unseen classes/n02219486-1608.jpg
- __MACOSX/supp/decodings/natural_image_pairs/unseen classes/._n02219486-1608.jpg
- supp/decodings/natural_image_pairs/unseen classes/n02871525-99.jpg
- __MACOSX/supp/decodings/natural_image_pairs/unseen classes/._n02871525-99.jpg
- supp/decodings/natural_image_pairs/unseen classes/n03127925-221_x.jpg
- __MACOSX/supp/decodings/natural_image_pairs/unseen classes/._n03127925-221_x.jpg
- supp/decodings/natural_image_pairs/unseen classes/n04522168-1341_x.jpg
- __MACOSX/supp/decodings/natural_image_pairs/unseen classes/._n04522168-1341_x.jpg
- supp/decodings/natural_image_pairs/unseen classes/n02871525-2954_predicted.jpg
- __MACOSX/supp/decodings/natural_image_pairs/unseen classes/._n02871525-2954_predicted.jpg
- supp/decodings/natural_image_pairs/unseen classes/n04522168-1341.jpg
- __MACOSX/supp/decodings/natural_image_pairs/unseen classes/._n04522168-1341.jpg
- supp/decodings/natural_image_pairs/unseen classes/n01981276-899_predicted.jpg
- __MACOSX/supp/decodings/natural_image_pairs/unseen classes/._n01981276-899_predicted.jpg
- supp/decodings/natural_image_pairs/unseen classes/n02871525-2704_predicted.jpg
- __MACOSX/supp/decodings/natural_image_pairs/unseen classes/._n02871525-2704_predicted.jpg
- supp/decodings/natural_image_pairs/unseen classes/n02129165-1061.jpg
- __MACOSX/supp/decodings/natural_image_pairs/unseen classes/._n02129165-1061.jpg
- supp/decodings/natural_image_pairs/unseen classes/n02871525-33_x.jpg
- __MACOSX/supp/decodings/natural_image_pairs/unseen classes/._n02871525-33_x.jpg
- supp/decodings/natural_image_pairs/unseen classes/n03272010-2130_predicted.jpg
- __MACOSX/supp/decodings/natural_image_pairs/unseen classes/._n03272010-2130_predicted.jpg
- supp/decodings/natural_image_pairs/unseen classes/n04146614-1189.jpg
- __MACOSX/supp/decodings/natural_image_pairs/unseen classes/._n04146614-1189.jpg
- supp/decodings/natural_image_pairs/unseen classes/n02871525-294_x.jpg
- __MACOSX/supp/decodings/natural_image_pairs/unseen classes/._n02871525-294_x.jpg
- supp/decodings/natural_image_pairs/unseen classes/n04149813-11.jpg
- __MACOSX/supp/decodings/natural_image_pairs/unseen classes/._n04149813-11.jpg
- supp/decodings/natural_image_pairs/unseen classes/n02219486-756_predicted.jpg
- __MACOSX/supp/decodings/natural_image_pairs/unseen classes/._n02219486-756_predicted.jpg
- supp/decodings/natural_image_pairs/seenclasses/n02950826-20537.jpg
- __MACOSX/supp/decodings/natural_image_pairs/seenclasses/._n02950826-20537.jpg
- supp/decodings/natural_image_pairs/seenclasses/n02981792-24476_predicted.jpg
- __MACOSX/supp/decodings/natural_image_pairs/seenclasses/._n02981792-24476_predicted.jpg
- supp/decodings/natural_image_pairs/seenclasses/n02950826-20537_x.jpg
- __MACOSX/supp/decodings/natural_image_pairs/seenclasses/._n02950826-20537_x.jpg
- supp/decodings/natural_image_pairs/seenclasses/n02981792-22652_predicted.jpg
- __MACOSX/supp/decodings/natural_image_pairs/seenclasses/._n02981792-22652_predicted.jpg
- supp/decodings/natural_image_pairs/seenclasses/n02174001-18015.jpg
- __MACOSX/supp/decodings/natural_image_pairs/seenclasses/._n02174001-18015.jpg
- supp/decodings/natural_image_pairs/seenclasses/n01910747-3624_predicted.jpg
- __MACOSX/supp/decodings/natural_image_pairs/seenclasses/._n01910747-3624_predicted.jpg
- supp/decodings/natural_image_pairs/seenclasses/n02174001-15455.jpg
- __MACOSX/supp/decodings/natural_image_pairs/seenclasses/._n02174001-15455.jpg
- supp/decodings/natural_image_pairs/seenclasses/n02174001-15455_predicted.jpg
- __MACOSX/supp/decodings/natural_image_pairs/seenclasses/._n02174001-15455_predicted.jpg
- supp/decodings/natural_image_pairs/seenclasses/n02981792-22652.jpg
- __MACOSX/supp/decodings/natural_image_pairs/seenclasses/._n02981792-22652.jpg
- supp/decodings/natural_image_pairs/seenclasses/n02950826-20233.jpg
- __MACOSX/supp/decodings/natural_image_pairs/seenclasses/._n02950826-20233.jpg
- supp/decodings/natural_image_pairs/seenclasses/n02174001-18015_predicted.jpg
- __MACOSX/supp/decodings/natural_image_pairs/seenclasses/._n02174001-18015_predicted.jpg
- supp/decodings/natural_image_pairs/seenclasses/n02174001-18015_x.jpg
- __MACOSX/supp/decodings/natural_image_pairs/seenclasses/._n02174001-18015_x.jpg
- supp/decodings/natural_image_pairs/seenclasses/n01532829-7473.jpg
- __MACOSX/supp/decodings/natural_image_pairs/seenclasses/._n01532829-7473.jpg
- supp/decodings/natural_image_pairs/seenclasses/n02981792-24476_x.jpg
- __MACOSX/supp/decodings/natural_image_pairs/seenclasses/._n02981792-24476_x.jpg
- supp/decodings/natural_image_pairs/seenclasses/n02981792-22652_x.jpg
- __MACOSX/supp/decodings/natural_image_pairs/seenclasses/._n02981792-22652_x.jpg
- supp/decodings/natural_image_pairs/seenclasses/n01910747-3624_x.jpg
- __MACOSX/supp/decodings/natural_image_pairs/seenclasses/._n01910747-3624_x.jpg
[truncated: 170 more entries]
