# Supplementary material
Source: ML conference proceedings conference paper supplement (https://proceedings.mlr.press/v139/wang21s.html)
Supplement: Supplementary file 2 [file wang21s-supp.zip › supp/animations/Note.txt]

Model input is on the left, output drawing is on the right.
