# Supplementary material (part 1 of 2)
Source: ML conference proceedings conference paper supplement (https://proceedings.mlr.press/v139/wang21s.html)

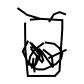

Supplement: Supplementary file 2 [file wang21s-supp.zip › supp/decodings/natural_image_pairs/unseen classes/n02871525-33_predicted.jpg]

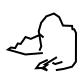

Supplement: Supplementary file 2 [file wang21s-supp.zip › supp/decodings/natural_image_pairs/unseen classes/n02129165-1061_predicted.jpg]

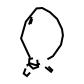

Supplement: Supplementary file 2 [file wang21s-supp.zip › supp/decodings/natural_image_pairs/unseen classes/n03146219-1206_predicted.jpg]

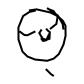

Supplement: Supplementary file 2 [file wang21s-supp.zip › supp/decodings/natural_image_pairs/unseen classes/n03775546-37_predicted.jpg]

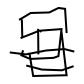

Supplement: Supplementary file 2 [file wang21s-supp.zip › supp/decodings/natural_image_pairs/unseen classes/n02871525-99_predicted.jpg]

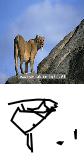

Supplement: Supplementary file 2 [file wang21s-supp.zip › supp/decodings/natural_image_pairs/unseen classes/n02129165-902.jpg]

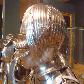

Supplement: Supplementary file 2 [file wang21s-supp.zip › supp/decodings/natural_image_pairs/unseen classes/n03146219-1206_x.jpg]

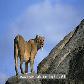

Supplement: Supplementary file 2 [file wang21s-supp.zip › supp/decodings/natural_image_pairs/unseen classes/n02129165-902_x.jpg]

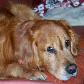

Supplement: Supplementary file 2 [file wang21s-supp.zip › supp/decodings/natural_image_pairs/unseen classes/n02099601-2007_x.jpg]

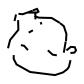

Supplement: Supplementary file 2 [file wang21s-supp.zip › supp/decodings/natural_image_pairs/unseen classes/n04522168-96_predicted.jpg]

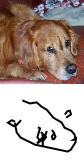

Supplement: Supplementary file 2 [file wang21s-supp.zip › supp/decodings/natural_image_pairs/unseen classes/n02099601-2007.jpg]

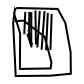

Supplement: Supplementary file 2 [file wang21s-supp.zip › supp/decodings/natural_image_pairs/unseen classes/n04418357-916_predicted.jpg]

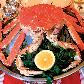

Supplement: Supplementary file 2 [file wang21s-supp.zip › supp/decodings/natural_image_pairs/unseen classes/n01981276-899_x.jpg]

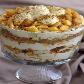

Supplement: Supplementary file 2 [file wang21s-supp.zip › supp/decodings/natural_image_pairs/unseen classes/n07613480-11681_x.jpg]

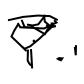

Supplement: Supplementary file 2 [file wang21s-supp.zip › supp/decodings/natural_image_pairs/unseen classes/n02129165-902_predicted.jpg]

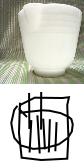

Supplement: Supplementary file 2 [file wang21s-supp.zip › supp/decodings/natural_image_pairs/unseen classes/n03775546-1039.jpg]

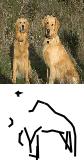

Supplement: Supplementary file 2 [file wang21s-supp.zip › supp/decodings/natural_image_pairs/unseen classes/n02099601-864.jpg]

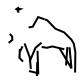

Supplement: Supplementary file 2 [file wang21s-supp.zip › supp/decodings/natural_image_pairs/unseen classes/n02099601-864_predicted.jpg]

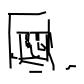

Supplement: Supplementary file 2 [file wang21s-supp.zip › supp/decodings/natural_image_pairs/unseen classes/n04149813-11_predicted.jpg]

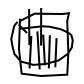

Supplement: Supplementary file 2 [file wang21s-supp.zip › supp/decodings/natural_image_pairs/unseen classes/n03775546-1039_predicted.jpg]

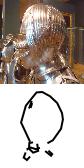

Supplement: Supplementary file 2 [file wang21s-supp.zip › supp/decodings/natural_image_pairs/unseen classes/n03146219-1206.jpg]

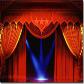

Supplement: Supplementary file 2 [file wang21s-supp.zip › supp/decodings/natural_image_pairs/unseen classes/n04418357-916_x.jpg]

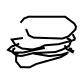

Supplement: Supplementary file 2 [file wang21s-supp.zip › supp/decodings/natural_image_pairs/unseen classes/n07613480-10172_predicted.jpg]

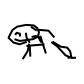

Supplement: Supplementary file 2 [file wang21s-supp.zip › supp/decodings/natural_image_pairs/unseen classes/n02219486-1608_predicted.jpg]

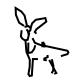

Supplement: Supplementary file 2 [file wang21s-supp.zip › supp/decodings/natural_image_pairs/unseen classes/n02099601-1790_predicted.jpg]

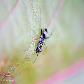

Supplement: Supplementary file 2 [file wang21s-supp.zip › supp/decodings/natural_image_pairs/unseen classes/n02219486-756_x.jpg]

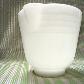

Supplement: Supplementary file 2 [file wang21s-supp.zip › supp/decodings/natural_image_pairs/unseen classes/n03775546-1039_x.jpg]

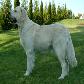

Supplement: Supplementary file 2 [file wang21s-supp.zip › supp/decodings/natural_image_pairs/unseen classes/n02099601-2046_x.jpg]

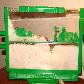

Supplement: Supplementary file 2 [file wang21s-supp.zip › supp/decodings/natural_image_pairs/unseen classes/n02219486-243_x.jpg]

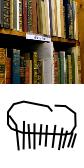

Supplement: Supplementary file 2 [file wang21s-supp.zip › supp/decodings/natural_image_pairs/unseen classes/n02871525-2954.jpg]

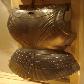

Supplement: Supplementary file 2 [file wang21s-supp.zip › supp/decodings/natural_image_pairs/unseen classes/n03146219-1477_x.jpg]

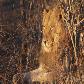

Supplement: Supplementary file 2 [file wang21s-supp.zip › supp/decodings/natural_image_pairs/unseen classes/n02129165-1061_x.jpg]

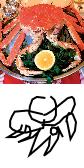

Supplement: Supplementary file 2 [file wang21s-supp.zip › supp/decodings/natural_image_pairs/unseen classes/n01981276-899.jpg]

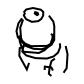

Supplement: Supplementary file 2 [file wang21s-supp.zip › supp/decodings/natural_image_pairs/unseen classes/n03775546-579_predicted.jpg]

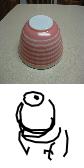

Supplement: Supplementary file 2 [file wang21s-supp.zip › supp/decodings/natural_image_pairs/unseen classes/n03775546-579.jpg]

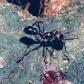

Supplement: Supplementary file 2 [file wang21s-supp.zip › supp/decodings/natural_image_pairs/unseen classes/n02219486-1608_x.jpg]

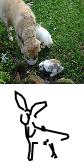

Supplement: Supplementary file 2 [file wang21s-supp.zip › supp/decodings/natural_image_pairs/unseen classes/n02099601-1790.jpg]

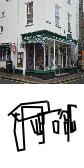

Supplement: Supplementary file 2 [file wang21s-supp.zip › supp/decodings/natural_image_pairs/unseen classes/n02871525-1222.jpg]

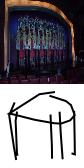

Supplement: Supplementary file 2 [file wang21s-supp.zip › supp/decodings/natural_image_pairs/unseen classes/n04418357-677.jpg]

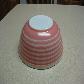

Supplement: Supplementary file 2 [file wang21s-supp.zip › supp/decodings/natural_image_pairs/unseen classes/n03775546-579_x.jpg]

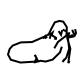

Supplement: Supplementary file 2 [file wang21s-supp.zip › supp/decodings/natural_image_pairs/unseen classes/n02443484-1652_predicted.jpg]

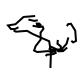

Supplement: Supplementary file 2 [file wang21s-supp.zip › supp/decodings/natural_image_pairs/unseen classes/n02099601-2046_predicted.jpg]

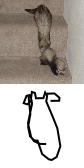

Supplement: Supplementary file 2 [file wang21s-supp.zip › supp/decodings/natural_image_pairs/unseen classes/n02443484-2952.jpg]

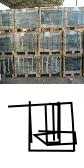

Supplement: Supplementary file 2 [file wang21s-supp.zip › supp/decodings/natural_image_pairs/unseen classes/n03127925-221.jpg]

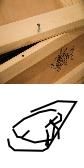

Supplement: Supplementary file 2 [file wang21s-supp.zip › supp/decodings/natural_image_pairs/unseen classes/n03127925-1337.jpg]

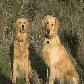

Supplement: Supplementary file 2 [file wang21s-supp.zip › supp/decodings/natural_image_pairs/unseen classes/n02099601-864_x.jpg]

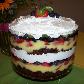

Supplement: Supplementary file 2 [file wang21s-supp.zip › supp/decodings/natural_image_pairs/unseen classes/n07613480-10172_x.jpg]

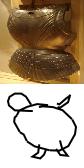

Supplement: Supplementary file 2 [file wang21s-supp.zip › supp/decodings/natural_image_pairs/unseen classes/n03146219-1477.jpg]

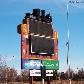

Supplement: Supplementary file 2 [file wang21s-supp.zip › supp/decodings/natural_image_pairs/unseen classes/n04149813-11_x.jpg]

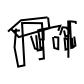

Supplement: Supplementary file 2 [file wang21s-supp.zip › supp/decodings/natural_image_pairs/unseen classes/n02871525-1222_predicted.jpg]

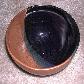

Supplement: Supplementary file 2 [file wang21s-supp.zip › supp/decodings/natural_image_pairs/unseen classes/n03775546-37_x.jpg]

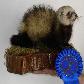

Supplement: Supplementary file 2 [file wang21s-supp.zip › supp/decodings/natural_image_pairs/unseen classes/n02443484-1652_x.jpg]

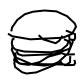

Supplement: Supplementary file 2 [file wang21s-supp.zip › supp/decodings/natural_image_pairs/unseen classes/n07613480-11681_predicted.jpg]

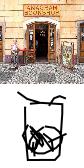

Supplement: Supplementary file 2 [file wang21s-supp.zip › supp/decodings/natural_image_pairs/unseen classes/n02871525-33.jpg]

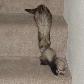

Supplement: Supplementary file 2 [file wang21s-supp.zip › supp/decodings/natural_image_pairs/unseen classes/n02443484-2952_x.jpg]

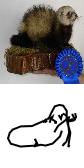

Supplement: Supplementary file 2 [file wang21s-supp.zip › supp/decodings/natural_image_pairs/unseen classes/n02443484-1652.jpg]

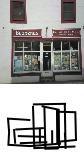

Supplement: Supplementary file 2 [file wang21s-supp.zip › supp/decodings/natural_image_pairs/unseen classes/n02871525-2704.jpg]

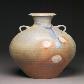

Supplement: Supplementary file 2 [file wang21s-supp.zip › supp/decodings/natural_image_pairs/unseen classes/n04522168-96_x.jpg]

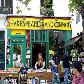

Supplement: Supplementary file 2 [file wang21s-supp.zip › supp/decodings/natural_image_pairs/unseen classes/n02871525-99_x.jpg]

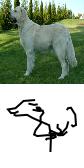

Supplement: Supplementary file 2 [file wang21s-supp.zip › supp/decodings/natural_image_pairs/unseen classes/n02099601-2046.jpg]

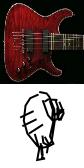

Supplement: Supplementary file 2 [file wang21s-supp.zip › supp/decodings/natural_image_pairs/unseen classes/n03272010-2130.jpg]

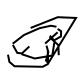

Supplement: Supplementary file 2 [file wang21s-supp.zip › supp/decodings/natural_image_pairs/unseen classes/n03127925-1337_predicted.jpg]

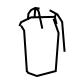

Supplement: Supplementary file 2 [file wang21s-supp.zip › supp/decodings/natural_image_pairs/unseen classes/n04522168-1341_predicted.jpg]

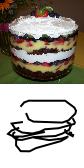

Supplement: Supplementary file 2 [file wang21s-supp.zip › supp/decodings/natural_image_pairs/unseen classes/n07613480-10172.jpg]

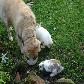

Supplement: Supplementary file 2 [file wang21s-supp.zip › supp/decodings/natural_image_pairs/unseen classes/n02099601-1770_x.jpg]

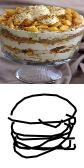

Supplement: Supplementary file 2 [file wang21s-supp.zip › supp/decodings/natural_image_pairs/unseen classes/n07613480-11681.jpg]

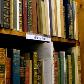

Supplement: Supplementary file 2 [file wang21s-supp.zip › supp/decodings/natural_image_pairs/unseen classes/n02871525-2954_x.jpg]

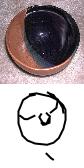

Supplement: Supplementary file 2 [file wang21s-supp.zip › supp/decodings/natural_image_pairs/unseen classes/n03775546-37.jpg]

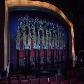

Supplement: Supplementary file 2 [file wang21s-supp.zip › supp/decodings/natural_image_pairs/unseen classes/n04418357-677_x.jpg]

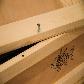

Supplement: Supplementary file 2 [file wang21s-supp.zip › supp/decodings/natural_image_pairs/unseen classes/n03127925-1317_x.jpg]

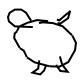

Supplement: Supplementary file 2 [file wang21s-supp.zip › supp/decodings/natural_image_pairs/unseen classes/n03146219-1477_predicted.jpg]

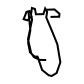

Supplement: Supplementary file 2 [file wang21s-supp.zip › supp/decodings/natural_image_pairs/unseen classes/n02443484-2952_predicted.jpg]

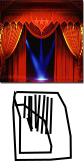

Supplement: Supplementary file 2 [file wang21s-supp.zip › supp/decodings/natural_image_pairs/unseen classes/n04418357-916.jpg]

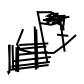

Supplement: Supplementary file 2 [file wang21s-supp.zip › supp/decodings/natural_image_pairs/unseen classes/n02871525-294_predicted.jpg]

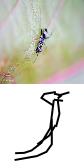

Supplement: Supplementary file 2 [file wang21s-supp.zip › supp/decodings/natural_image_pairs/unseen classes/n02219486-756.jpg]

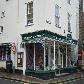

Supplement: Supplementary file 2 [file wang21s-supp.zip › supp/decodings/natural_image_pairs/unseen classes/n02871525-1222_x.jpg]

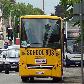

Supplement: Supplementary file 2 [file wang21s-supp.zip › supp/decodings/natural_image_pairs/unseen classes/n04146614-1189_x.jpg]

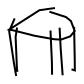

Supplement: Supplementary file 2 [file wang21s-supp.zip › supp/decodings/natural_image_pairs/unseen classes/n04418357-677_predicted.jpg]

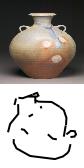

Supplement: Supplementary file 2 [file wang21s-supp.zip › supp/decodings/natural_image_pairs/unseen classes/n04522168-96.jpg]

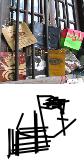

Supplement: Supplementary file 2 [file wang21s-supp.zip › supp/decodings/natural_image_pairs/unseen classes/n02871525-294.jpg]

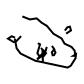

Supplement: Supplementary file 2 [file wang21s-supp.zip › supp/decodings/natural_image_pairs/unseen classes/n02099601-2007_predicted.jpg]

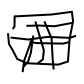

Supplement: Supplementary file 2 [file wang21s-supp.zip › supp/decodings/natural_image_pairs/unseen classes/n02219486-243_predicted.jpg]

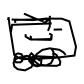

Supplement: Supplementary file 2 [file wang21s-supp.zip › supp/decodings/natural_image_pairs/unseen classes/n04146614-1189_predicted.jpg]

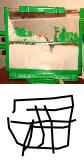

Supplement: Supplementary file 2 [file wang21s-supp.zip › supp/decodings/natural_image_pairs/unseen classes/n02219486-243.jpg]

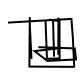

Supplement: Supplementary file 2 [file wang21s-supp.zip › supp/decodings/natural_image_pairs/unseen classes/n03127925-221_predicted.jpg]

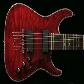

Supplement: Supplementary file 2 [file wang21s-supp.zip › supp/decodings/natural_image_pairs/unseen classes/n03272010-2130_x.jpg]

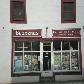

Supplement: Supplementary file 2 [file wang21s-supp.zip › supp/decodings/natural_image_pairs/unseen classes/n02871525-2704_x.jpg]

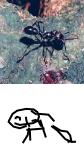

Supplement: Supplementary file 2 [file wang21s-supp.zip › supp/decodings/natural_image_pairs/unseen classes/n02219486-1608.jpg]

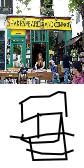

Supplement: Supplementary file 2 [file wang21s-supp.zip › supp/decodings/natural_image_pairs/unseen classes/n02871525-99.jpg]

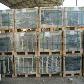

Supplement: Supplementary file 2 [file wang21s-supp.zip › supp/decodings/natural_image_pairs/unseen classes/n03127925-221_x.jpg]

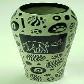

Supplement: Supplementary file 2 [file wang21s-supp.zip › supp/decodings/natural_image_pairs/unseen classes/n04522168-1341_x.jpg]

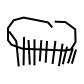

Supplement: Supplementary file 2 [file wang21s-supp.zip › supp/decodings/natural_image_pairs/unseen classes/n02871525-2954_predicted.jpg]

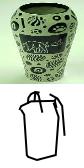

Supplement: Supplementary file 2 [file wang21s-supp.zip › supp/decodings/natural_image_pairs/unseen classes/n04522168-1341.jpg]

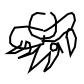

Supplement: Supplementary file 2 [file wang21s-supp.zip › supp/decodings/natural_image_pairs/unseen classes/n01981276-899_predicted.jpg]

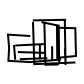

Supplement: Supplementary file 2 [file wang21s-supp.zip › supp/decodings/natural_image_pairs/unseen classes/n02871525-2704_predicted.jpg]

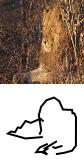

Supplement: Supplementary file 2 [file wang21s-supp.zip › supp/decodings/natural_image_pairs/unseen classes/n02129165-1061.jpg]

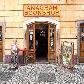

Supplement: Supplementary file 2 [file wang21s-supp.zip › supp/decodings/natural_image_pairs/unseen classes/n02871525-33_x.jpg]

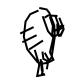

Supplement: Supplementary file 2 [file wang21s-supp.zip › supp/decodings/natural_image_pairs/unseen classes/n03272010-2130_predicted.jpg]

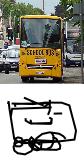

Supplement: Supplementary file 2 [file wang21s-supp.zip › supp/decodings/natural_image_pairs/unseen classes/n04146614-1189.jpg]

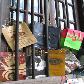

Supplement: Supplementary file 2 [file wang21s-supp.zip › supp/decodings/natural_image_pairs/unseen classes/n02871525-294_x.jpg]
