# Supplementary material (part 2 of 2)
Source: ML conference proceedings conference paper supplement (https://proceedings.mlr.press/v139/wang21s.html)

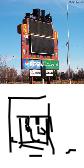

Supplement: Supplementary file 2 [file wang21s-supp.zip › supp/decodings/natural_image_pairs/unseen classes/n04149813-11.jpg]

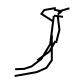

Supplement: Supplementary file 2 [file wang21s-supp.zip › supp/decodings/natural_image_pairs/unseen classes/n02219486-756_predicted.jpg]

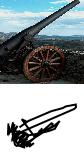

Supplement: Supplementary file 2 [file wang21s-supp.zip › supp/decodings/natural_image_pairs/seenclasses/n02950826-20537.jpg]

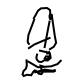

Supplement: Supplementary file 2 [file wang21s-supp.zip › supp/decodings/natural_image_pairs/seenclasses/n02981792-24476_predicted.jpg]

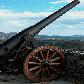

Supplement: Supplementary file 2 [file wang21s-supp.zip › supp/decodings/natural_image_pairs/seenclasses/n02950826-20537_x.jpg]

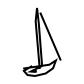

Supplement: Supplementary file 2 [file wang21s-supp.zip › supp/decodings/natural_image_pairs/seenclasses/n02981792-22652_predicted.jpg]

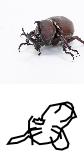

Supplement: Supplementary file 2 [file wang21s-supp.zip › supp/decodings/natural_image_pairs/seenclasses/n02174001-18015.jpg]

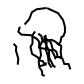

Supplement: Supplementary file 2 [file wang21s-supp.zip › supp/decodings/natural_image_pairs/seenclasses/n01910747-3624_predicted.jpg]

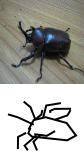

Supplement: Supplementary file 2 [file wang21s-supp.zip › supp/decodings/natural_image_pairs/seenclasses/n02174001-15455.jpg]

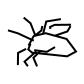

Supplement: Supplementary file 2 [file wang21s-supp.zip › supp/decodings/natural_image_pairs/seenclasses/n02174001-15455_predicted.jpg]

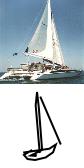

Supplement: Supplementary file 2 [file wang21s-supp.zip › supp/decodings/natural_image_pairs/seenclasses/n02981792-22652.jpg]

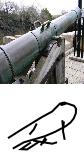

Supplement: Supplementary file 2 [file wang21s-supp.zip › supp/decodings/natural_image_pairs/seenclasses/n02950826-20233.jpg]

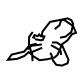

Supplement: Supplementary file 2 [file wang21s-supp.zip › supp/decodings/natural_image_pairs/seenclasses/n02174001-18015_predicted.jpg]

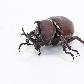

Supplement: Supplementary file 2 [file wang21s-supp.zip › supp/decodings/natural_image_pairs/seenclasses/n02174001-18015_x.jpg]

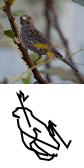

Supplement: Supplementary file 2 [file wang21s-supp.zip › supp/decodings/natural_image_pairs/seenclasses/n01532829-7473.jpg]

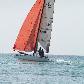

Supplement: Supplementary file 2 [file wang21s-supp.zip › supp/decodings/natural_image_pairs/seenclasses/n02981792-24476_x.jpg]

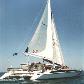

Supplement: Supplementary file 2 [file wang21s-supp.zip › supp/decodings/natural_image_pairs/seenclasses/n02981792-22652_x.jpg]

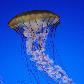

Supplement: Supplementary file 2 [file wang21s-supp.zip › supp/decodings/natural_image_pairs/seenclasses/n01910747-3624_x.jpg]

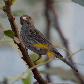

Supplement: Supplementary file 2 [file wang21s-supp.zip › supp/decodings/natural_image_pairs/seenclasses/n01532829-7473_x.jpg]

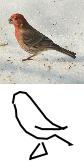

Supplement: Supplementary file 2 [file wang21s-supp.zip › supp/decodings/natural_image_pairs/seenclasses/n01532829-4753.jpg]

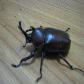

Supplement: Supplementary file 2 [file wang21s-supp.zip › supp/decodings/natural_image_pairs/seenclasses/n02174001-15455_x.jpg]

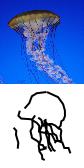

Supplement: Supplementary file 2 [file wang21s-supp.zip › supp/decodings/natural_image_pairs/seenclasses/n01910747-3624.jpg]

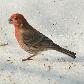

Supplement: Supplementary file 2 [file wang21s-supp.zip › supp/decodings/natural_image_pairs/seenclasses/n01532829-4753_x.jpg]

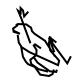

Supplement: Supplementary file 2 [file wang21s-supp.zip › supp/decodings/natural_image_pairs/seenclasses/n01532829-7473_predicted.jpg]

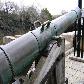

Supplement: Supplementary file 2 [file wang21s-supp.zip › supp/decodings/natural_image_pairs/seenclasses/n02950826-20233_x.jpg]

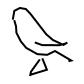

Supplement: Supplementary file 2 [file wang21s-supp.zip › supp/decodings/natural_image_pairs/seenclasses/n01532829-4753_predicted.jpg]

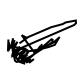

Supplement: Supplementary file 2 [file wang21s-supp.zip › supp/decodings/natural_image_pairs/seenclasses/n02950826-20537_predicted.jpg]

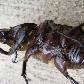

Supplement: Supplementary file 2 [file wang21s-supp.zip › supp/decodings/natural_image_pairs/seenclasses/n02174001-10911_x.jpg]

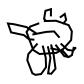

Supplement: Supplementary file 2 [file wang21s-supp.zip › supp/decodings/natural_image_pairs/seenclasses/n02174001-10911_predicted.jpg]

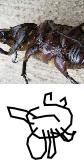

Supplement: Supplementary file 2 [file wang21s-supp.zip › supp/decodings/natural_image_pairs/seenclasses/n02174001-10911.jpg]

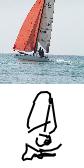

Supplement: Supplementary file 2 [file wang21s-supp.zip › supp/decodings/natural_image_pairs/seenclasses/n02981792-24476.jpg]

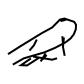

Supplement: Supplementary file 2 [file wang21s-supp.zip › supp/decodings/natural_image_pairs/seenclasses/n02950826-20233_predicted.jpg]

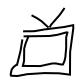

Supplement: Supplementary file 2 [file wang21s-supp.zip › supp/decodings/sketches_pairs/seen_classes/television-139_x.jpg]

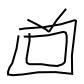

Supplement: Supplementary file 2 [file wang21s-supp.zip › supp/decodings/sketches_pairs/seen_classes/television-139_predicted.jpg]

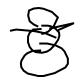

Supplement: Supplementary file 2 [file wang21s-supp.zip › supp/decodings/sketches_pairs/seen_classes/snowman-267_predicted.jpg]

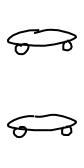

Supplement: Supplementary file 2 [file wang21s-supp.zip › supp/decodings/sketches_pairs/seen_classes/skateboard-67.jpg]

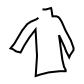

Supplement: Supplementary file 2 [file wang21s-supp.zip › supp/decodings/sketches_pairs/seen_classes/sweater-416_predicted.jpg]

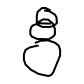

Supplement: Supplementary file 2 [file wang21s-supp.zip › supp/decodings/sketches_pairs/seen_classes/snowman-154_predicted - Copy.jpg]

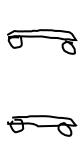

Supplement: Supplementary file 2 [file wang21s-supp.zip › supp/decodings/sketches_pairs/seen_classes/skateboard-71.jpg]

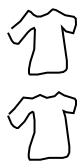

Supplement: Supplementary file 2 [file wang21s-supp.zip › supp/decodings/sketches_pairs/seen_classes/sweater-344.jpg]

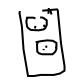

Supplement: Supplementary file 2 [file wang21s-supp.zip › supp/decodings/sketches_pairs/seen_classes/power outlet-37_predicted.jpg]

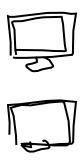

Supplement: Supplementary file 2 [file wang21s-supp.zip › supp/decodings/sketches_pairs/seen_classes/television-393.jpg]

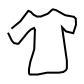

Supplement: Supplementary file 2 [file wang21s-supp.zip › supp/decodings/sketches_pairs/seen_classes/sweater-344_x.jpg]

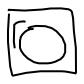

Supplement: Supplementary file 2 [file wang21s-supp.zip › supp/decodings/sketches_pairs/seen_classes/washing machine-83_x.jpg]

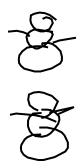

Supplement: Supplementary file 2 [file wang21s-supp.zip › supp/decodings/sketches_pairs/seen_classes/snowman-267.jpg]

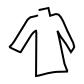

Supplement: Supplementary file 2 [file wang21s-supp.zip › supp/decodings/sketches_pairs/seen_classes/sweater-416_x.jpg]

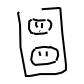

Supplement: Supplementary file 2 [file wang21s-supp.zip › supp/decodings/sketches_pairs/seen_classes/power outlet-37_x.jpg]

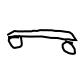

Supplement: Supplementary file 2 [file wang21s-supp.zip › supp/decodings/sketches_pairs/seen_classes/skateboard-71_x.jpg]

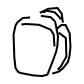

Supplement: Supplementary file 2 [file wang21s-supp.zip › supp/decodings/sketches_pairs/seen_classes/backpack-316_x.jpg]

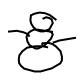

Supplement: Supplementary file 2 [file wang21s-supp.zip › supp/decodings/sketches_pairs/seen_classes/snowman-267_x.jpg]

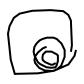

Supplement: Supplementary file 2 [file wang21s-supp.zip › supp/decodings/sketches_pairs/seen_classes/washing machine-369_predicted.jpg]

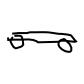

Supplement: Supplementary file 2 [file wang21s-supp.zip › supp/decodings/sketches_pairs/seen_classes/skateboard-71_predicted.jpg]

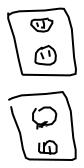

Supplement: Supplementary file 2 [file wang21s-supp.zip › supp/decodings/sketches_pairs/seen_classes/power outlet-271.jpg]

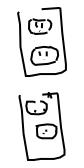

Supplement: Supplementary file 2 [file wang21s-supp.zip › supp/decodings/sketches_pairs/seen_classes/power outlet-37.jpg]

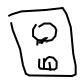

Supplement: Supplementary file 2 [file wang21s-supp.zip › supp/decodings/sketches_pairs/seen_classes/power outlet-271_predicted.jpg]

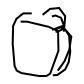

Supplement: Supplementary file 2 [file wang21s-supp.zip › supp/decodings/sketches_pairs/seen_classes/backpack-316_predicted.jpg]

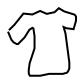

Supplement: Supplementary file 2 [file wang21s-supp.zip › supp/decodings/sketches_pairs/seen_classes/sweater-344_predicted.jpg]

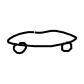

Supplement: Supplementary file 2 [file wang21s-supp.zip › supp/decodings/sketches_pairs/seen_classes/skateboard-67_predicted.jpg]

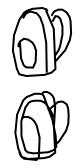

Supplement: Supplementary file 2 [file wang21s-supp.zip › supp/decodings/sketches_pairs/seen_classes/backpack-77.jpg]

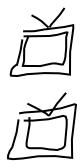

Supplement: Supplementary file 2 [file wang21s-supp.zip › supp/decodings/sketches_pairs/seen_classes/television-139.jpg]

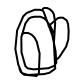

Supplement: Supplementary file 2 [file wang21s-supp.zip › supp/decodings/sketches_pairs/seen_classes/backpack-77_predicted.jpg]

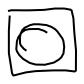

Supplement: Supplementary file 2 [file wang21s-supp.zip › supp/decodings/sketches_pairs/seen_classes/washing machine-83_predicted.jpg]

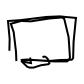

Supplement: Supplementary file 2 [file wang21s-supp.zip › supp/decodings/sketches_pairs/seen_classes/television-393_predicted.jpg]

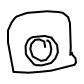

Supplement: Supplementary file 2 [file wang21s-supp.zip › supp/decodings/sketches_pairs/seen_classes/washing machine-369_x.jpg]

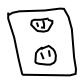

Supplement: Supplementary file 2 [file wang21s-supp.zip › supp/decodings/sketches_pairs/seen_classes/power outlet-271_x.jpg]

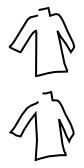

Supplement: Supplementary file 2 [file wang21s-supp.zip › supp/decodings/sketches_pairs/seen_classes/sweater-416.jpg]

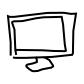

Supplement: Supplementary file 2 [file wang21s-supp.zip › supp/decodings/sketches_pairs/seen_classes/television-393_x.jpg]

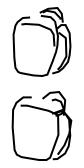

Supplement: Supplementary file 2 [file wang21s-supp.zip › supp/decodings/sketches_pairs/seen_classes/backpack-316.jpg]

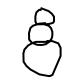

Supplement: Supplementary file 2 [file wang21s-supp.zip › supp/decodings/sketches_pairs/seen_classes/snowman-154_x.jpg]

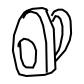

Supplement: Supplementary file 2 [file wang21s-supp.zip › supp/decodings/sketches_pairs/seen_classes/backpack-77_x.jpg]

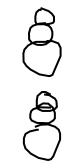

Supplement: Supplementary file 2 [file wang21s-supp.zip › supp/decodings/sketches_pairs/seen_classes/snowman-154.jpg]

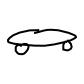

Supplement: Supplementary file 2 [file wang21s-supp.zip › supp/decodings/sketches_pairs/seen_classes/skateboard-67_x.jpg]

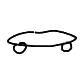

Supplement: Supplementary file 2 [file wang21s-supp.zip › supp/decodings/sketches_pairs/seen_classes/cleanbg/skateboard-67_predicted-removebg-preview.png]

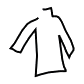

Supplement: Supplementary file 2 [file wang21s-supp.zip › supp/decodings/sketches_pairs/seen_classes/cleanbg/sweater-416_predicted-removebg-preview.png]

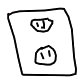

Supplement: Supplementary file 2 [file wang21s-supp.zip › supp/decodings/sketches_pairs/seen_classes/cleanbg/power_outlet-271_x-removebg-preview.png]

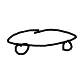

Supplement: Supplementary file 2 [file wang21s-supp.zip › supp/decodings/sketches_pairs/seen_classes/cleanbg/skateboard-67_x-removebg-preview.png]

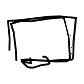

Supplement: Supplementary file 2 [file wang21s-supp.zip › supp/decodings/sketches_pairs/seen_classes/cleanbg/television-393_predicted-removebg-preview-removebg-preview.png]

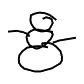

Supplement: Supplementary file 2 [file wang21s-supp.zip › supp/decodings/sketches_pairs/seen_classes/cleanbg/snowman-267_x-removebg-preview.png]

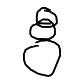

Supplement: Supplementary file 2 [file wang21s-supp.zip › supp/decodings/sketches_pairs/seen_classes/cleanbg/snowman-154_predicted-removebg-preview.png]

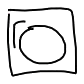

Supplement: Supplementary file 2 [file wang21s-supp.zip › supp/decodings/sketches_pairs/seen_classes/cleanbg/washing_machine-83_x-removebg-preview.png]

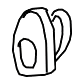

Supplement: Supplementary file 2 [file wang21s-supp.zip › supp/decodings/sketches_pairs/seen_classes/cleanbg/backpack-77_x-removebg-preview.png]

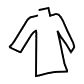

Supplement: Supplementary file 2 [file wang21s-supp.zip › supp/decodings/sketches_pairs/seen_classes/cleanbg/sweater-416_x-removebg-preview.png]

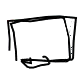

Supplement: Supplementary file 2 [file wang21s-supp.zip › supp/decodings/sketches_pairs/seen_classes/cleanbg/television-393_predicted-removebg-preview.png]

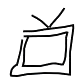

Supplement: Supplementary file 2 [file wang21s-supp.zip › supp/decodings/sketches_pairs/seen_classes/cleanbg/television-139_x-removebg-preview.png]

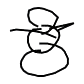

Supplement: Supplementary file 2 [file wang21s-supp.zip › supp/decodings/sketches_pairs/seen_classes/cleanbg/snowman-267_predicted-removebg-preview.png]

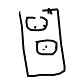

Supplement: Supplementary file 2 [file wang21s-supp.zip › supp/decodings/sketches_pairs/seen_classes/cleanbg/power_outlet-37_predicted-removebg-preview.png]

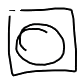

Supplement: Supplementary file 2 [file wang21s-supp.zip › supp/decodings/sketches_pairs/seen_classes/cleanbg/washing_machine-83_predicted-removebg-preview.png]

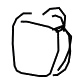

Supplement: Supplementary file 2 [file wang21s-supp.zip › supp/decodings/sketches_pairs/seen_classes/cleanbg/backpack-316_predicted-removebg-preview.png]

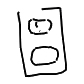

Supplement: Supplementary file 2 [file wang21s-supp.zip › supp/decodings/sketches_pairs/seen_classes/cleanbg/power_outlet-37_x-removebg-preview.png]

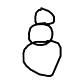

Supplement: Supplementary file 2 [file wang21s-supp.zip › supp/decodings/sketches_pairs/seen_classes/cleanbg/snowman-154_x-removebg-preview.png]

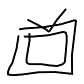

Supplement: Supplementary file 2 [file wang21s-supp.zip › supp/decodings/sketches_pairs/seen_classes/cleanbg/television-139_predicted-removebg-preview.png]

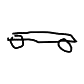

Supplement: Supplementary file 2 [file wang21s-supp.zip › supp/decodings/sketches_pairs/seen_classes/cleanbg/skateboard-71_predicted-removebg-preview.png]

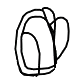

Supplement: Supplementary file 2 [file wang21s-supp.zip › supp/decodings/sketches_pairs/seen_classes/cleanbg/backpack-77_predicted-removebg-preview (1).png]

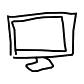

Supplement: Supplementary file 2 [file wang21s-supp.zip › supp/decodings/sketches_pairs/seen_classes/cleanbg/television-393_x-removebg-preview.png]

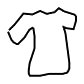

Supplement: Supplementary file 2 [file wang21s-supp.zip › supp/decodings/sketches_pairs/seen_classes/cleanbg/sweater-344_predicted-removebg-preview.png]

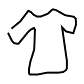

Supplement: Supplementary file 2 [file wang21s-supp.zip › supp/decodings/sketches_pairs/seen_classes/cleanbg/sweater-344_x-removebg-preview.png]

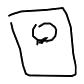

Supplement: Supplementary file 2 [file wang21s-supp.zip › supp/decodings/sketches_pairs/seen_classes/cleanbg/power_outlet-271_predicted-removebg-preview.png]
